# Supplementary material for: An ultrathin TiO2 interfacial layer enhancing the performance of an FeVO4 photoanode for water splitting
Source: Royal Society of Chemistry journal article supplement (doi:10.1039/d0se01546f), 2020-11-12
Supplement: d0se01546f1.pdf [file d0se01546f1.pdf]

## Electronic Supplementary Information

### Ultrathin TiO<sub>2</sub> Interfacial Layer Enhancing the Performance of FeVO<sub>4</sub> Photoanode for Water Splitting

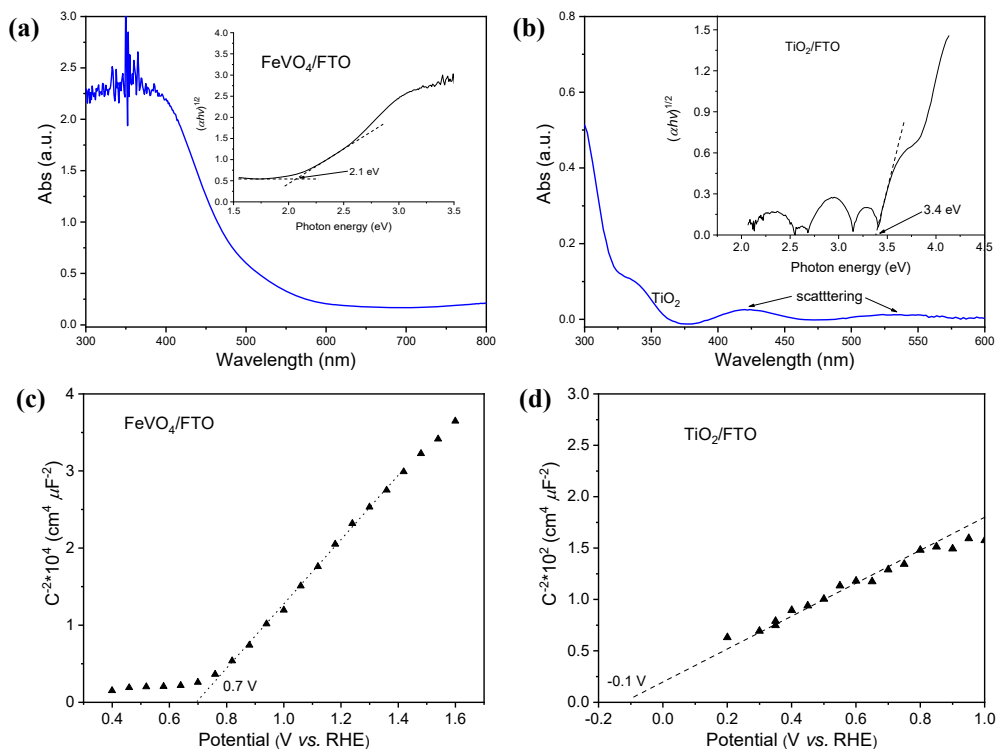

**Fig. S1** (a-b) UV-Vis absorption spectra for the samples, the insets showed the plots of  $(\alpha h\nu)^{1/2}$  versus the photon energy, and the bandgap energies of FeVO<sub>4</sub> and TiO<sub>2</sub> were estimated to be 2.1 and 3.4 eV, respectively. (c-d) Mott-Schottky plots for the samples, the flat-band potentials of FeVO<sub>4</sub> and TiO<sub>2</sub> were determined to be 0.7 and -0.1 VRHE, respectively.

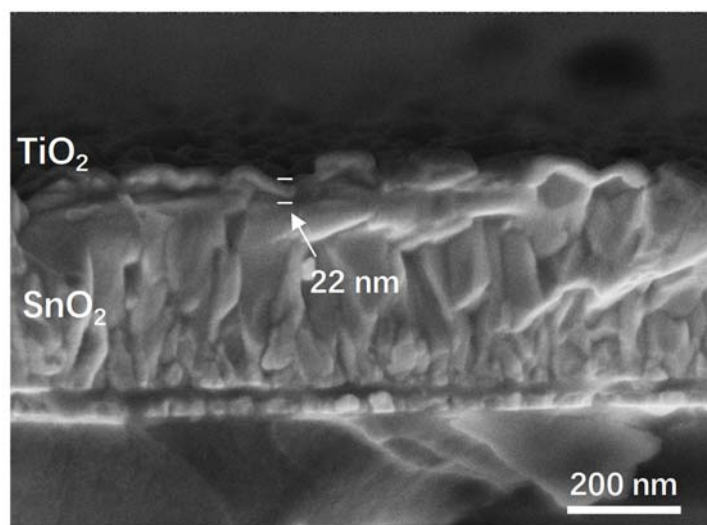

**Fig. S2** Cross-sectional SEM image of FTO with a 300-cycle  $\text{TiO}_2$  deposition layer

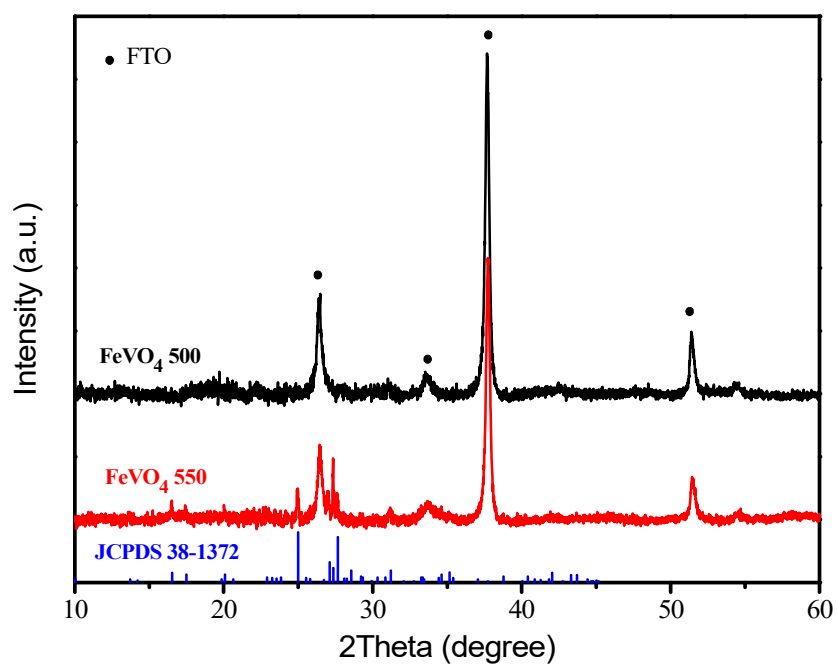

**Fig. S3** XRD patterns of  $\text{FeVO}_4$  photoanodes annealed at 500 °C and 550 °C

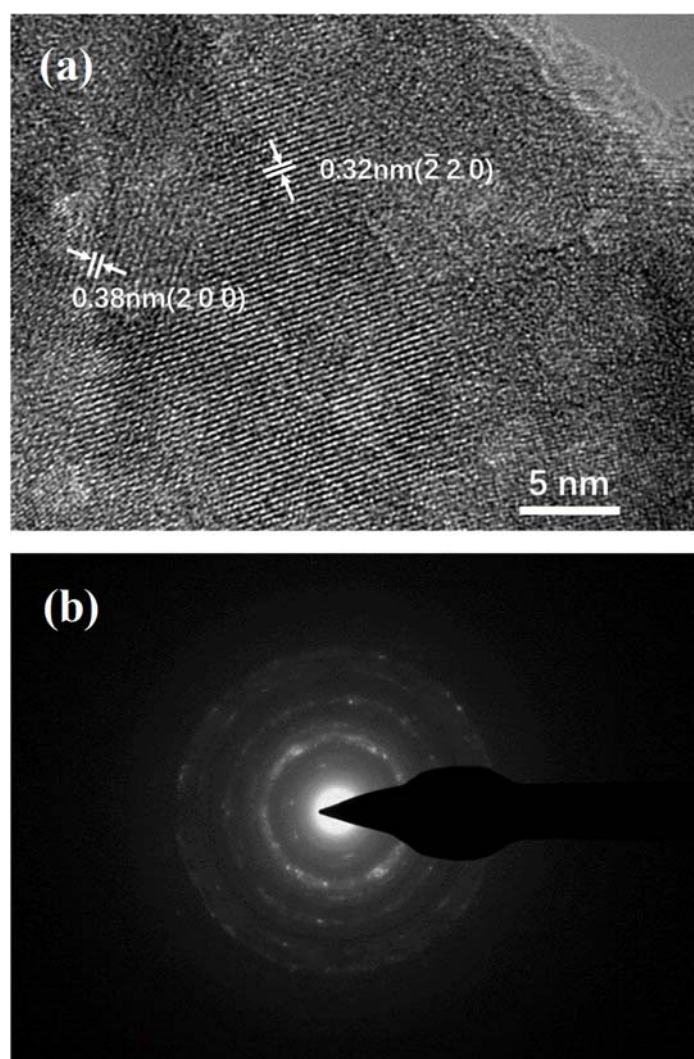

**Fig. S4** (a) HRTEM and (b) Electron diffraction patterns of FeVO<sub>4</sub> scratched from FeVO<sub>4</sub>/TiO<sub>2</sub>/FTO

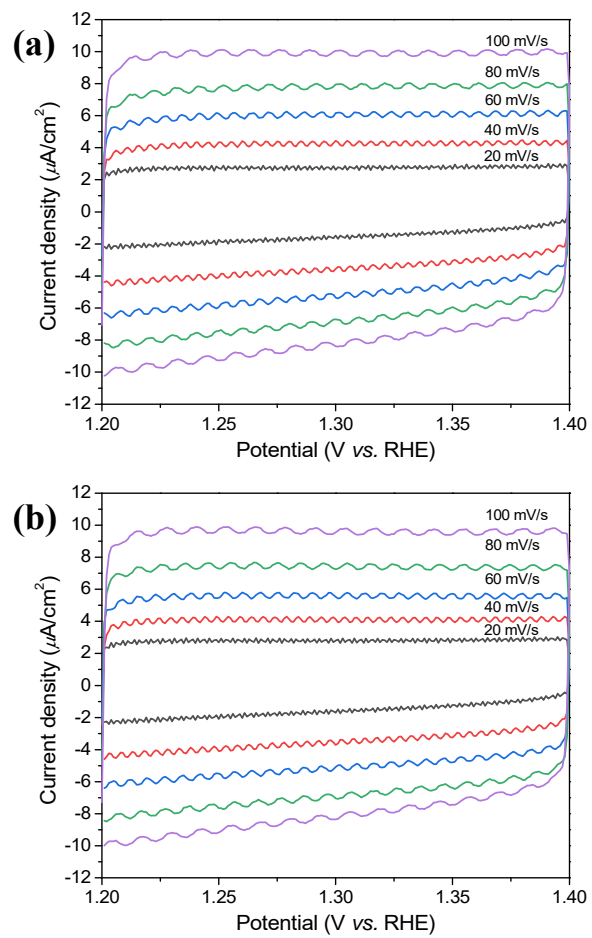

**Fig. S5** Cyclic voltammetry curves of (a) FeVO<sub>4</sub> and (b) FeVO<sub>4</sub>/TiO<sub>2</sub>/FTO electrodes under dark.

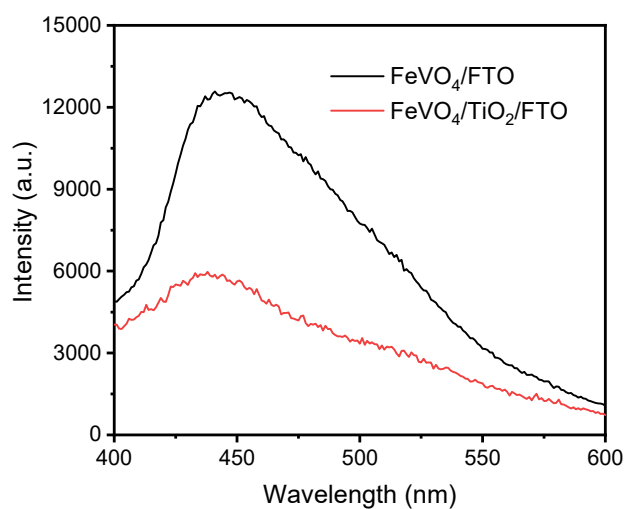

**Fig. S6** The photocurrent density at 1.6 V<sub>RHE</sub> for FeVO<sub>4</sub>/TiO<sub>2</sub>/FTO electrode with different thickness of TiO<sub>2</sub> underlayers

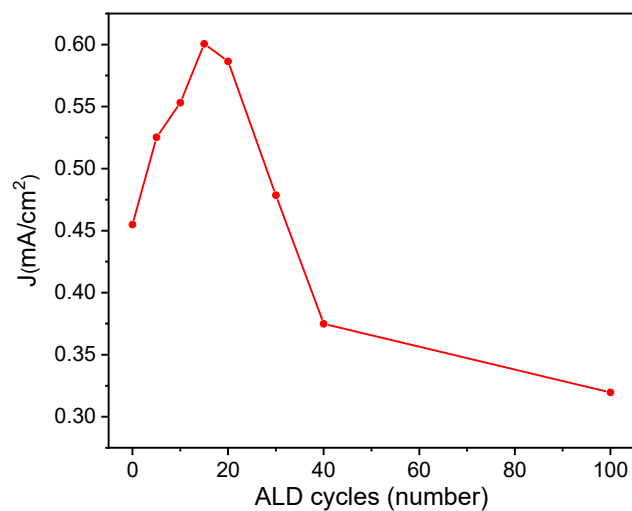

**Fig. S7** The photoluminescence spectra for the electrodes, with the excitation wavelength at 350 nm.

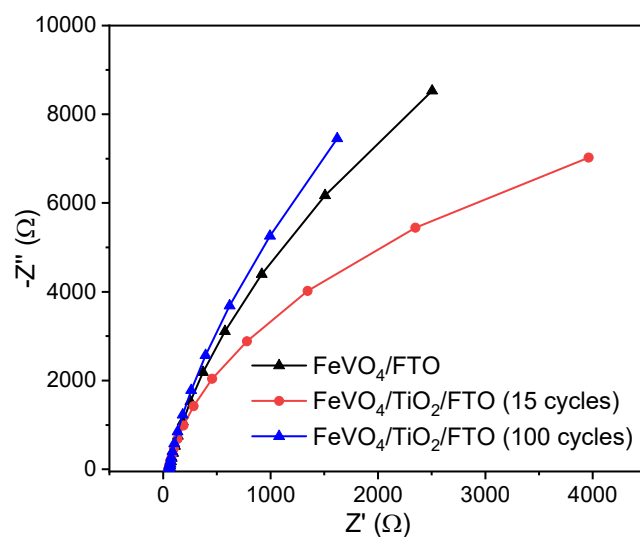

**Fig. S8** Nyquist plots of the electrodes.

**Table S1** The resistance values estimated by fitting the EIS data for the electrodes

| Sample                                                | $R_s(\Omega)$  | $R_B(k\Omega)$  | $R_I(k\Omega)$ |
|-------------------------------------------------------|----------------|-----------------|----------------|
| FeVO <sub>4</sub> /FTO                                | $54.3 \pm 0.2$ | $3.23 \pm 0.04$ | $60.9 \pm 0.1$ |
| FeVO <sub>4</sub> /TiO <sub>2</sub> /FTO (15 cycles)  | $54.0 \pm 0.2$ | $2.27 \pm 0.05$ | $21.4 \pm 0.1$ |
| FeVO <sub>4</sub> /TiO <sub>2</sub> /FTO (100 cycles) | $54.6 \pm 0.2$ | $8.26 \pm 0.09$ | $80.3 \pm 0.4$ |

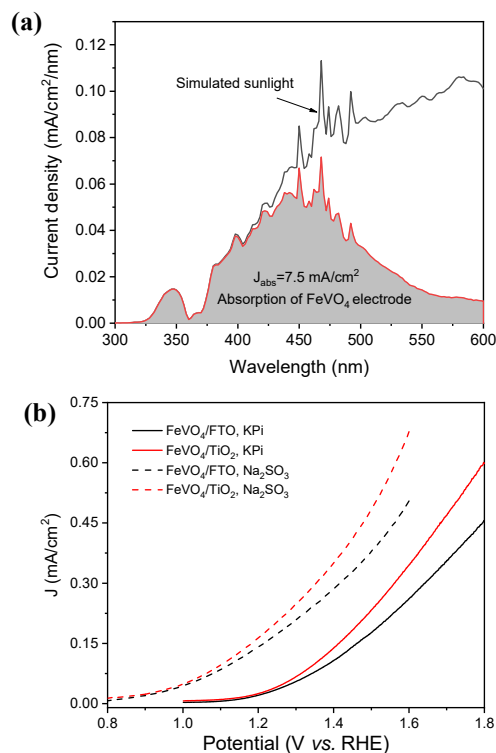

**Fig. S9** The theoretical photocurrent spectrum for  $\text{FeVO}_4$  electrode obtained by multiplication of its light absorbance spectrum with photoflux spectrum of the simulated sunlight, with the theoretical photocurrent density of  $7.5 \text{ mA/cm}^2$ , (b) the photocurrent density-applied potential curves of the photoelectrodes in potassium phosphate (KPi) buffer solution or  $\text{Na}_2\text{SO}_3$  solution.

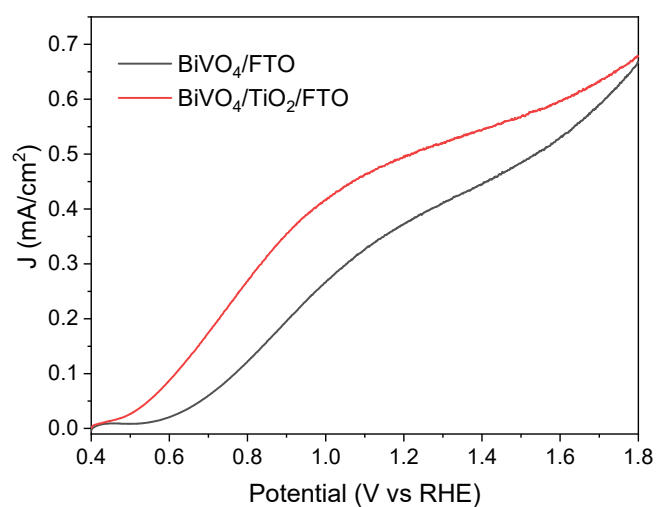

**Fig. S10** The photocurrent density-applied potential curves over the photoelectrodes for PEC water oxidation reaction
